# Supplementary material for: Daily cost of consumer food wasted, inedible, and consumed in the United States, 2001–2016
Source: Nutr J. 2020 Apr 20;19:35. doi: 10.1186/s12937-020-00552-w (PMC7168972; doi:10.1186/s12937-020-00552-w)
Supplement: Supplementary file 3 — Additional file 3 : Table S1. Foods included in analysis. NHANES, National Health and Nutrition Examination Survey; CPI, Consumer Price Index; FoodAPS, Food Acquisition and Purchase Survey. 1Approximately 80% of FoodAPS codes come from the USDA Food and Nutrient Database for Dietary Studes (FNDDS), and the remaining codes are manually assigned by FoodAPS staff (FoodAPS). 2Leading digits in each 8-digit food code. 3All codes begin with the prefix “CUUR0000S”. 4Leading digits in each 8- or 10-digit food code. 5Includes crackers and other grain-based snacks. 6Includes French toast and other sweet grain-based foods. 7Includes imitation milk, flavored milk and milk drinks, evaporated and condensed milk, and dry and powdered milk. 8Includes dairy-based sauces. 9Includes lamb, goat, and game. 10Includes sandwiches made from all meat and seafood sources, luncheon meats, and burgers. 11Includes butter and margarine. 12Includes water, alcohol, and beverage concentrates. [file 12937_2020_552_MOESM3_ESM.xlsx]

## Sheet: Supplemental Table 1
Supplemental Table 1: Foods included in analysis
Foods				NHANES code2		CPI code3		FoodAPS code1
								FNDDS4		FoodAPS4
Fruits and vegetables
	Fruits
		Whole fruits		40		AF113		4, 6, and 7		28, 60, 64, 68, 70
		Fruit juice		61, 64, and 781		AF113		4, 6, and 7		28, 60, 64, 68, 70
		Dried fruit		62		AF113		4, 6, and 7		28, 60, 64, 68, 70
	Vegetables
		Dark green		72		AF113		4, 6, and 7		28, 60, 64, 68, 70
		Yellow		73		AF113		4, 6, and 7		28, 60, 64, 68, 70
		Tomatoes		74		AF113		4, 6, and 7		28, 60, 64, 68, 70
		Potatoes		71		AF113		4, 6, and 7		28, 60, 64, 68, 70
		Legumes		41		AF113		4, 6, and 7		28, 60, 64, 68, 70
		Other		75		AF113		4, 6, and 7		28, 60, 64, 68, 70
		Mixed vegetable dishes		77		AF113		4, 6, and 7		28, 60, 64, 68, 70
Grains
	Bread, flour, biscuits, and muffins
		Bread		51		F111		5		32, 34, 35, 36, 40, 42, 44, 46, 48, 50, 52, and 55
		Flour		50		F111		5		32, 34, 35, 36, 40, 42, 44, 46, 48, 50, 52, and 55
		Biscuits and muffins		52		F111		5		32, 34, 35, 36, 40, 42, 44, 46, 48, 50, 52, and 55
	Salty snacks5			54		F111		5		32, 34, 35, 36, 40, 42, 44, 46, 48, 50, 52, and 55
	Breafkast foods									32, 34, 35, 36, 40, 42, 44, 46, 48, 50, 52, and 55
		Pancakes and waffles6		55		F111		5		32, 34, 35, 36, 40, 42, 44, 46, 48, 50, 52, and 55
		Breakfast cereal		57		F111		5		32, 34, 35, 36, 40, 42, 44, 46, 48, 50, 52, and 55
		Pasta		561		F111		5		32, 34, 35, 36, 40, 42, 44, 46, 48, 50, 52, and 55
		Rice		562		F111		5		32, 34, 35, 36, 40, 42, 44, 46, 48, 50, 52, and 55
		Mixed grain dishes		58		F111		5		32, 34, 35, 36, 40, 42, 44, 46, 48, 50, 52, and 55
Dairy
	Milk7			11 except 114		EFJ		1		10, 12, 14, 16, and 18
	Cream8			12		EFJ		1		10, 12, 14, 16, and 18
	Cheese			14		EFJ		1		10, 12, 14, 16, and 18
	Yogurt			114		EFJ		1		10, 12, 14, 16, and 18
Meat and seafood
	Beef			21 and 232		EFC		25, 27, and 28		30
	Pork			22		EFD		25, 27, and 28		30
	Hotdogs and sausages			252 except 2523 and 2524		AF11211		25, 27, and 28		30
	Poultry			24		EFF		25, 27, and 28		30
	Organ meat			251		AF11211		25, 27, and 28		30
	Other meat9			23		AF1121		25, 27, and 28		30
	Sandwiches10			275, 2523, and 2524		AF11211		25, 27, and 28		30
	Mixed meat dishes			20 and 27, except 275		AF11211		25, 27, and 28		30
	Seafood			26		EFG		26		24
Frozen and shelf-stable foods				28		AF11		all other codes		37, 38, 54, 84, 90, 94, and 99
Eggs				3		EFH		3		25
Nuts and seeds				42		EFS		8		80
Sweets
	Cake, Cookies, pies, and pastries			53		EFR		91		57, 58, and 88
	Sugar and candy			13 and 91		EFR		91		57, 58, and 88
Nonalcoholic beverages				92		AF114		92, 94, and 95		71, 72, 73, 75, 77, 78
Fats and oils
	Table fats11			81		EFS		8		80
	Oils			82		EFS		8		80
	Salad dressing			83		EFS		8		80
Other12				All other codes		EFT		all other codes		37, 38, 54, 84, 90, 94, and 99
NHANES, National Health and Nutrition Examination Survey
CPI, Consumer Price Index
FoodAPS, Food Acquisition and Purchase Survey
1Approximately 80% of FoodAPS codes come from the USDA Food and Nutrient Database for Dietary Studes (FNDDS), and the remaining codes are manually assigned by FoodAPS staff (FoodAPS).
2Leading digits in each 8-digit food code.
3All codes begin with the prefix "CUUR0000S".
4Leading digits in each 8- or 10-digit food code.
5Includes crackers and other grain-based snacks.
6Includes French toast and other sweet grain-based foods.
7Includes imitation milk, flavored milk and milk drinks, evaporated and condensed milk, and dry and powdered milk.
8Includes dairy-based sauces.
9Includes lamb, goat, and game.
10Includes sandwiches made from all meat and seafood sources, luncheon meats, and burgers.
11Includes butter and margarine.
12Includes water, alcohol, and beverage concentrates.
