# Supplementary material for: Daily cost of consumer food wasted, inedible, and consumed in the United States, 2001–2016
Source: Nutr J. 2020 Apr 20;19:35. doi: 10.1186/s12937-020-00552-w (PMC7168972; doi:10.1186/s12937-020-00552-w)
Supplement: Supplementary file 4 — Additional file 4 : Table S2. Retail prices for foods purchased for consumption at home and away from home, 2012–2013 (n = 4305). Data acquired from the USDA National Household Food Acquisition and Purchase Survey, 2012–2013. 1Ratio of food away from home to food at home. [file 12937_2020_552_MOESM4_ESM.xlsx]

## Sheet: Supplemental Table 2
Supplemental Table 2: Retail prices for foods purchased for consumption at home and away from home, 2012-2013 (n=4,305)
Food category				Food at home			Food away from home			Coefficient1
				Price per 100 g (95% CI), $
Total				3.3838	(3.25-3.52)		7.90604	(7.42-8.39)		2.33644
Meat, poultry, and seafood				0.560649	(0.51-0.61)		1.77918	(1.64-1.91)		3.17343
	Meat			0.622451	(0.53-0.72)		3.76962	(3.20-4.34)		6.0561
	Poultry			0.534139	(0.49-0.58)		2.39378	(1.98-2.81)		4.48156
	Seafood			0.844724	(0.71-0.98)		4.1944	(3.55-4.84)		4.96541
Eggs				0.304015	(0.28-0.33)		2.09539	(1.87-2.32)		6.89241
Dairy				0.336971	(0.32-0.36)		0.695497	(0.59-0.80)		2.06397
Fats and oils				0.481574	(0.45-0.51)		0.41083	(0.09-0.73)		0.853098
Fruits and vegetables				0.387429	(0.36-0.41)		0.592724	(0.52-0.66)		1.52989
Sweets				0.736191	(0.67-0.80)		1.34988	(0.89-1.81)		1.83361
Grains				0.529376	(0.50-0.56)		1.05228	(0.98-1.12)		1.98777
Nonalcoholic beverages				0.421013	(0.35-0.50)		0.153193	(0.14-0.16)		0.363868
Other				0.596144	(0.53-0.66)		1.05353	(0.90-1.20)		1.76725
Data acquired from the USDA National Household Food Acquisition and Purchase Survey, 2012-2013
1Ratio of food away from home to food at home.
