# Supplementary material for: Daily cost of consumer food wasted, inedible, and consumed in the United States, 2001–2016
Source: Nutr J. 2020 Apr 20;19:35. doi: 10.1186/s12937-020-00552-w (PMC7168972; doi:10.1186/s12937-020-00552-w)
Supplement: Supplementary file 6 — Additional file 6 : Table S4. Daily per capita cost of food waste by food type, 2001–2016 (n = 39,758). 95% confidence intervals not listed for foods with waste <$0.01. 1Paired Wald test used to estimate the difference between food at home and food away from home. 2Includes crackers and other grain-based snacks. 3Includes French toast and other sweet grain-based foods. 4Includes imitation milk, flavored milk and milk drinks, evaporated and condensed milk, and dry and powdered milk. 5Includes dairy-based sauces. 6Includes lamb, goat, and game. 7Includes sandwiches made from all meat and seafood sources, luncheon meats, and burgers. 8Includes beverage concentrates. 9Includes butter and margarine. 10Includes water, alcohol, and beverage concentrates. [file 12937_2020_552_MOESM6_ESM.xlsx]

## Sheet: Supplemental Table 4
Supplemental Table 4: Daily per capita cost of food waste by food type, 2001-2016 (n=39,758)
Foods				All food			Food at home			Food away from home			P1
				Mean (95% CI), $
Total				3.61963	(3.52-3.82)		1.77412	(1.70-1.85)		1.84551	(1.78-1.99)		0.154
Fruits and vegetables				1.0809	(1.02-1.14)		0.680054	(0.63-0.73)		0.400845	(0.37-0.43)		7.17938e-19
	Fruits			0.405401	(0.38-0.43)		0.243084	(0.22-0.26)		0.162317	(0.15-0.18)		1.50193e-07
		Whole fruits		0.315776	(0.29-0.34)		0.184707	(0.17-2.00)		0.131069	(0.12-0.15)		0.000427701
		Fruit juice		0.0843832	(0.08-0.09)		0.0553278	(0.05-0.06)		0.0290554	(0.03-0.03)		4.77299e-17
		Dried fruit		0.00524183	(0.00-0.01)		<0.01			<0.01			0.959134
	Vegetables			0.675497	(0.63-0.72)		0.43697	(0.39-0.48)		0.238528	(0.22-0.26)		3.1373e-14
		Green		0.0395767	(0.04-0.04)		0.0232611	(0.02-0.03)		0.0163156	(0.01-0.02)		0.000473596
		Yellow		0.0422995	(0.03-0.06)		0.0295621	(0.02-0.04)		0.0127374	(0.01-0.02)		0.00711038
		Tomatoes		0.0225081	(0.02-0.02)		0.0118186	(0.01-0.01)		0.0106895	(0.01-0.01)		0.0963845
		Potatoes		0.0414176	(0.04-0.04)		0.0184521	(0.02-0.02)		0.0229655	(0.02-0.02)		4.54716e-10
		Legumes		0.00759553	(0.01-0.01)		<0.01			<0.01			0.458192
		Other		0.52125	(0.47-0.57)		0.349525	(0.31-0.39)		0.171725	(0.15-0.19)		1.00193e-13
		Mixed vegetable dishes		<0.01			<0.01			<0.01			0.853258
Grains				0.36865	(0.36-0.38)		0.204633	(0.20-0.21)		0.164018	(0.16-0.17)		2.24882e-12
	Bread, flour, biscuits, and muffins			0.0613086	(0.06-0.06)		0.0313396	(0.03-0.03)		0.029969	(0.03-0.03)		0.734413
		Bread		0.0439535	(0.04-0.05)		0.0229161	(0.02-0.02)		0.0210374	(0.02-0.02)		0.166613
		Flour		<0.01			<0.01			<0.01			0.345637
		Biscuits and muffins		0.0173549	(0.01-0.02)		0.00842343	(0.01-0.01)		0.0089315	(0.01-0.01)		0.595662
	Salty snacks2			0.150525	(0.14-0.16)		0.0881047	(0.08-0.09)		0.06242	(0.06-0.07)		2.62635e-09
	Breafkast foods			0.0375999	(0.04-0.04)		0.0319384	(0.03-0.03)		0.00566143	(0.00-0.01)		1.4569e-66
		Pancakes and waffles3		0.00554697	(0.01-0.01)		<0.01			<0.01			0.631375
		Breakfast cereal		0.0320529	(0.03-0.03)		0.0289983	(0.03-0.03)		<0.01			1.72992e-67
		Pasta		<0.01			<0.01			<0.01			0.000357241
		Rice		<0.01			<0.01			<0.01			3.67702e-22
		Mixed grain dishes		0.115867	(0.11-0.12)		0.0509867	(0.05-0.05)		0.0648804	(0.06-0.07)		1.19771e-06
Dairy				0.180283	(0.17-0.19)		0.100386	(0.10-0.10)		0.079896	(0.08-0.08)		5.44023e-12
	Milk4			0.0671523	(0.06-0.07)		0.0434945	(0.04-0.05)		0.0236578	(0.02-0.03)		2.24876e-17
	Cream5			0.0726676	(0.07-0.08)		0.0361077	(0.03-0.04)		0.0365599	(0.03-0.04)		0.920521
	Cheese			0.0228829	(0.02-0.02)		0.0119934	(0.01-0.01)		0.0108895	(0.01-0.01)		0.161839
	Yogurt			0.0175796	(0.02-0.02)		0.00879085	(0.01-0.01)		0.00878877	(0.01-0.01)		0.745805
Meat and seafood				1.35404	(1.31-1.40)		0.413316	(0.40-0.43)		0.940721	(0.90-0.99)		9.25916e-44
	Beef			0.207765	(0.20-0.22)		0.0686331	(0.06-0.07)		0.139132	(0.13-0.15)		3.54624e-19
	Pork			0.0856531	(0.08-0.09)		0.0381557	(0.04-0.04)		0.0474974	(0.04-0.05)		0.00679757
	Hotdogs and sausages			0.0632763	(0.06-0.07)		0.0276249	(0.03-0.03)		0.0356514	(0.03-0.04)		0.000121229
	Poultry			0.113557	(0.11-0.12)		0.0360432	(0.03-0.04)		0.0775141	(0.07-0.08)		2.95744e-27
	Organ meat			<0.01			<0.01			<0.01			0.308358
	Other meat6			<0.01			<0.01			<0.01			0.0883433
	Sandwiches7			0.318152	(0.29-0.34)		0.115696	(0.11-0.12)		0.202457	(0.18-0.23)		3.26728e-11
	Mixed meat dishes			0.222228	(0.21-0.23)		0.0503691	(0.05-0.05)		0.171859	(0.16-0.18)		2.77837e-40
	Seafood			0.338884	(0.31-0.37)		0.0745888	(0.07-0.08)		0.264296	(0.24-0.29)		4.06674e-21
Frozen and shelf-stable foods				0.0486865	(0.04-0.05)		0.0319378	(0.03-0.04)		0.0167487	(0.01-0.02)		7.31142e-06
Eggs				0.0807031	(0.07-0.09)		0.0137705	(0.01-0.01)		0.0669326	(0.06-0.07)		1.52608e-31
Nuts and seeds				0.118568	(0.07-0.17)		0.0891942	(0.04-0.14)		0.0293734	(0.01-0.05)		0.0186815
Sweets				0.228013	(0.21-0.25)		0.115892	(0.11-0.13)		0.112121	(0.10-0.12)		0.463511
	Cake, Cookies, pies, and pastries			0.116698	(0.10-0.13)		0.056735	(0.05-0.07)		0.0599629	(0.05-0.07)		0.867644
	Sugar and candy			0.111316	(0.11-0.12)		0.0591573	(0.06-0.06)		0.0521582	(0.05-0.06)		0.00416102
Nonalcoholic beverages8				0.14554	(0.14-0.15)		0.115853	(0.11-0.12)		0.0296873	(0.03-0.03)		1.39873e-71
Fats and oils				<0.01			<0.01			<0.01			0
	Table fats9			0.0142463	(0.01-0.01)		0.00907891	(0.01-0.01)		0.00516742	(0.00-0.01)		3.14189e-24
	Oils			<0.01			<0.01			<0.01			7.43072e-28
	Salad dressing			<0.01			<0.01			<0.01			0.000246325
Other10				0.0103395	(0.01-0.01)		0.00616493	(0.01-0.01)		<0.01			2.06167e-11
95% confidence intervals not listed for foods with waste <$0.01.
1Paired Wald test used to estimate the difference between food at home and food away from home.
2Includes crackers and other grain-based snacks.
3Includes French toast and other sweet grain-based foods.
4Includes imitation milk, flavored milk and milk drinks, evaporated and condensed milk, and dry and powdered milk.
5Includes dairy-based sauces.
6Includes lamb, goat, and game.
7Includes sandwiches made from all meat and seafood sources, luncheon meats, and burgers.
8Includes beverage concentrates.
9Includes butter and margarine.
10Includes water, alcohol, and beverage concentrates.
