# Supplementary material for: Daily cost of consumer food wasted, inedible, and consumed in the United States, 2001–2016
Source: Nutr J. 2020 Apr 20;19:35. doi: 10.1186/s12937-020-00552-w (PMC7168972; doi:10.1186/s12937-020-00552-w)
Supplement: Supplementary file 7 — Additional file 7 : Table S5. Sensitivity analysis for food price assumptions, 2001–2016 (n = 39,758). Food purchased = wasted + inedible + consumed. Model 1: Expenditures estimated using 2008 dollar values for all foods reported consumed. Model 2: Expenditures estimated using food at home prices for all foods reported consumed. Model 3: Model 1 + Model 2. 1Difference between the estimated expenditure and each of the modeled expenditures tested using Wald tests at P < 0.05, with Bonferroni adjustment for multiple comparisons. Superscript letters indicate statistical significance for independent comparisons between estimated expenditure and Model 1 (a), Model 2 (b), and Model 3 (c). [file 12937_2020_552_MOESM7_ESM.xlsx]

## Sheet: Supplemental Table 5
Supplemental Table 5: Sensitivity analysis for food price assumptions, 2001-2016 (n=39,758)
							Sensitivity models: food prices
Food purchase location				Estimated			Model 1			Model 2			Model 3			P1
				Mean (95% CI), $
Purchased, all				13.2712	(13.01-13.53)		11.9004	(11.66-12.14)		10.8697	(10.65-11.09)		9.38548	(9.19-9.58)		a,b,c
	Inedible			1.88424	(1.78-1.99)		1.7428	(1.64-1.84)		1.76117	(1.66-1.86)		1.59193	(1.50-1.68)		c
	Wasted			3.61963	(3.52-3.72)		3.26256	(3.17-3.35)		2.97573	(2.89-3.06)		2.58321	(2.51-2.66)		a,b,c
	Consumed			7.76732	(7.65-7.88)		6.895	(6.79-7.00)		6.13282	(6.06-6.20)		5.21034	(5.15-5.27)		a,b,c
Purchased, food at home				6.42716	(6.26-6.60)		5.82239	(5.67-5.98)		6.42716	(6.26-6.60)		5.82239	(5.67-5.98)		a,c
	Inedible			1.17058	(1.09-1.25)		1.08627	(1.01-1.16)		1.17058	(1.09-1.25)		1.08627	(1.01-1.16)
	Wasted			1.77412	(1.70-1.85)		1.61107	(1.55-1.68)		1.77412	(1.70-1.85)		1.61107	(1.55-1.68)		a,c
	Consumed			3.48245	(3.43-3.53)		3.12506	(3.08-3.17)		3.48245	(3.43-3.53)		3.12506	(3.08-3.17)		a,c
Purchased, away from home				6.84404	(6.64-7.05)		6.07797	(5.89-6.26)		4.44256	(4.31-4.58)		3.56309	(3.45-3.67)		a,b,c
	Inedible			0.713658	(0.66-0.77)		0.656534	(0.60-0.71)		0.590586	(0.54-0.64)		0.505665	(0.46-0.55)		b,c
	Wasted			1.84551	(1.78-1.91)		1.65149	(1.59-1.71)		1.20161	(1.15-1.25)		0.972139	(0.93-1.01)		a,b,c
	Consumed			4.28487	(4.17-4.40)		3.76995	(3.67-3.87)		2.65037	(2.59-2.71)		2.08528	(2.04-2.13)		a,b,c
Food purchased = wasted + inedible + consumed
Model 1: Expenditures estimated using 2008 dollar values for all foods reported consumed.
Model 2: Expenditures estimated using food at home prices for all foods reported consumed.
Model 3: Model 1 + Model 2.
1Difference between the estimated expenditure and each of the modeled expenditures tested using Wald tests at P<0.05, with Bonferroni adjustment for multiple comparisons. Superscript letters indicate statistical significance for independent comparisons between estimated expenditure and Model 1 (a), Model 2 (b), and Model 3 (c).
