# Supplementary material for: Daily cost of consumer food wasted, inedible, and consumed in the United States, 2001–2016
Source: Nutr J. 2020 Apr 20;19:35. doi: 10.1186/s12937-020-00552-w (PMC7168972; doi:10.1186/s12937-020-00552-w)
Supplement: Supplementary file 8 — Additional file 8 : Table S6. Sensitivity analysis for food intake assumptions, 2001–2016 (n = 39,758). Food purchased = wasted + inedible + consumed. Model 4: Expenditures estimated for individuals included in the National Health and Nutrition Examination Survey, 2001–2010 only. Model 5: Expenditures estimated for individuals included in the National Health and Nutrition Examination Survey, 2011–2016 only. 1Difference between the estimated expenditure and each of the modeled expenditures tested using Wald tests at P < 0.05, with Bonferroni adjustment for multiple comparisons. Superscript letters indicate statistical significance for independent comparisons between estimated expenditure and Model 4 (a) and Model 5 (b). [file 12937_2020_552_MOESM8_ESM.xlsx]

## Sheet: Supplemental Table 6
Supplemental Table 6: Sensitivity analysis for food intake assumptions, 2001-2016 (n=39,758)
						Sensitivity models: food intake
Food purchase location			Estimated			Model 4			Model 5			P1
			Mean (95% CI), $
Purchased, all			13.2712	(13.01-13.53)		13.8694	(13.52-14.22)		12.3585	(11.97-12.74)		a,b
	Inedible		1.88424	(1.78-1.99)		2.09831	(1.94-2.26)		1.55763	(1.44-1.68)		b
	Wasted		3.61963	(3.52-3.72)		3.81358	(3.69-3.94)		3.32372	(3.17-3.48)		b
	Consumed		7.76732	(7.65-7.88)		7.95752	(7.80-8.11)		7.47714	(7.30-7.66)		b
Purchased, food at home			6.42716	(6.26-6.60)		6.66543	(6.43-6.90)		6.06363	(5.82-6.31)
	Inedible		1.17058	(1.09-1.25)		1.28932	(1.17-1.41)		0.989433	(0.89-1.09)		b
	Wasted		1.77412	(1.70-1.85)		1.84697	(1.76-1.93)		1.66298	(1.54-1.78)
	Consumed		3.48245	(3.43-3.53)		3.52914	(3.47-3.59)		3.41122	(3.33-3.49)
Purchased, away from home			6.84404	(6.64-7.05)		7.20399	(6.92-7.49)		6.29486	(6.01-6.58)		b
	Inedible		0.713658	(0.66-0.77)		0.808997	(0.72-0.90)		0.568198	(0.51-0.62)		b
	Wasted		1.84551	(1.78-1.91)		1.96661	(1.87-2.06)		1.66074	(1.57-1.75)		b
	Consumed		4.28487	(4.17-4.40)		4.42838	(4.28-4.58)		4.06591	(3.88-4.25)
Food purchased = wasted + inedible + consumed
Model 4: Expenditures estimated for individuals included in the National Health and Nutrition Examination Survey, 2001-2010 only.
Model 5: Expenditures estimated for individuals included in the National Health and Nutrition Examination Survey, 2011-2016 only.
1Difference between the estimated expenditure and each of the modeled expenditures tested using Wald tests at P<0.05, with Bonferroni adjustment for multiple comparisons. Superscript letters indicate statistical significance for independent comparisons between estimated expenditure and Model 4 (a) and Model 5 (b).
